# Supplementary material for: Understanding Interaction of Engineered Nanomaterials and Dissolved Organic Matters in River Sediments
Source: Research Square preprint supplement (doi:10.21203/rs.3.rs-1359970/v1), 2022-03-07
Supplement: Supplementary file 1 [file edf945c8e95f691e0272d9e8.docx]

Understanding interaction of engineered nanomaterials and dissolved organic matters in river sediments

Chen Zhanga, Xuejun Tana, Xue Yanga,*, Xingzu Whangb,**

a Shanghai Municipal Engineering Design Institute (Group) Co., LTD., Shanghai 200092, China

b Key Laboratory of Reservoir Aquatic Environment, Chongqing Institute of Green and Intelligent Technology, Chinese Academy of Sciences, Chongqing 400714, China

Dr. XueYang (Corresponding author): Shanghai Municipal Engineering Design Institute (Group) Co., LTD., No. 901 North Zhongshan Road (2nd), Yangpu District, Shanghai, China; E-mail address: yangxue@smedi.com.

Dr. Xingzu Wang (Corresponding author): Key Laboratory of Reservoir Aquatic Environment, Chongqing Institute of Green and Intelligent Technology, No. 266 Fangzheng Avenue, Beibei District, Chongqing, China; E-mail address: wangxingzu@cigit.ac.cn.

Table S1 Fitted results of fluorescence spectra for protein-like substances.

| Pollutant | Excitation wavelength (nm) | Temperature(°C) | Equation | R2 |
| --- | --- | --- | --- | --- |
| TiO2 | 280 | 15 | y = 0.5578x+1.0175 | 0.996 |
| TiO2 | 280 | 25 | y = 0.3735x + 1.0283 | 0.978 |
| TiO2 | 280 | 35 | y = 0.2481x + 1.0325 | 0.948 |
| TiO2 | 325 | 15 | y = 0.1369x + 0.9834 | 0.926 |
| TiO2 | 325 | 25 | y = 0.0983x + 1.0007 | 0.985 |
| TiO2 | 325 | 35 | y = 0.0688x + 0.9977 | 0.983 |

Table S2 Fitted results of fluorescence spectra for humic-like substances.

| Pollutant | Excitation wavelength (nm) | Temperature(°C) | Equation | R2 |
| --- | --- | --- | --- | --- |
| TiO2 | 280 | 15 | y = 0.8567x + 2.3297 | 0.992 |
| TiO2 | 280 | 25 | y = 0.8825x + 2.270 | 0.956 |
| TiO2 | 280 | 35 | y = 0.8754x + 2.1083 | 0.928 |
| TiO2 | 325 | 15 | y = 1.1727x + 2.5209 | 0.938 |
| TiO2 | 325 | 25 | y = 1.1556x + 2.4762 | 0.977 |
| TiO2 | 325 | 35 | y = 1.1916x + 2.3876 | 0.977 |


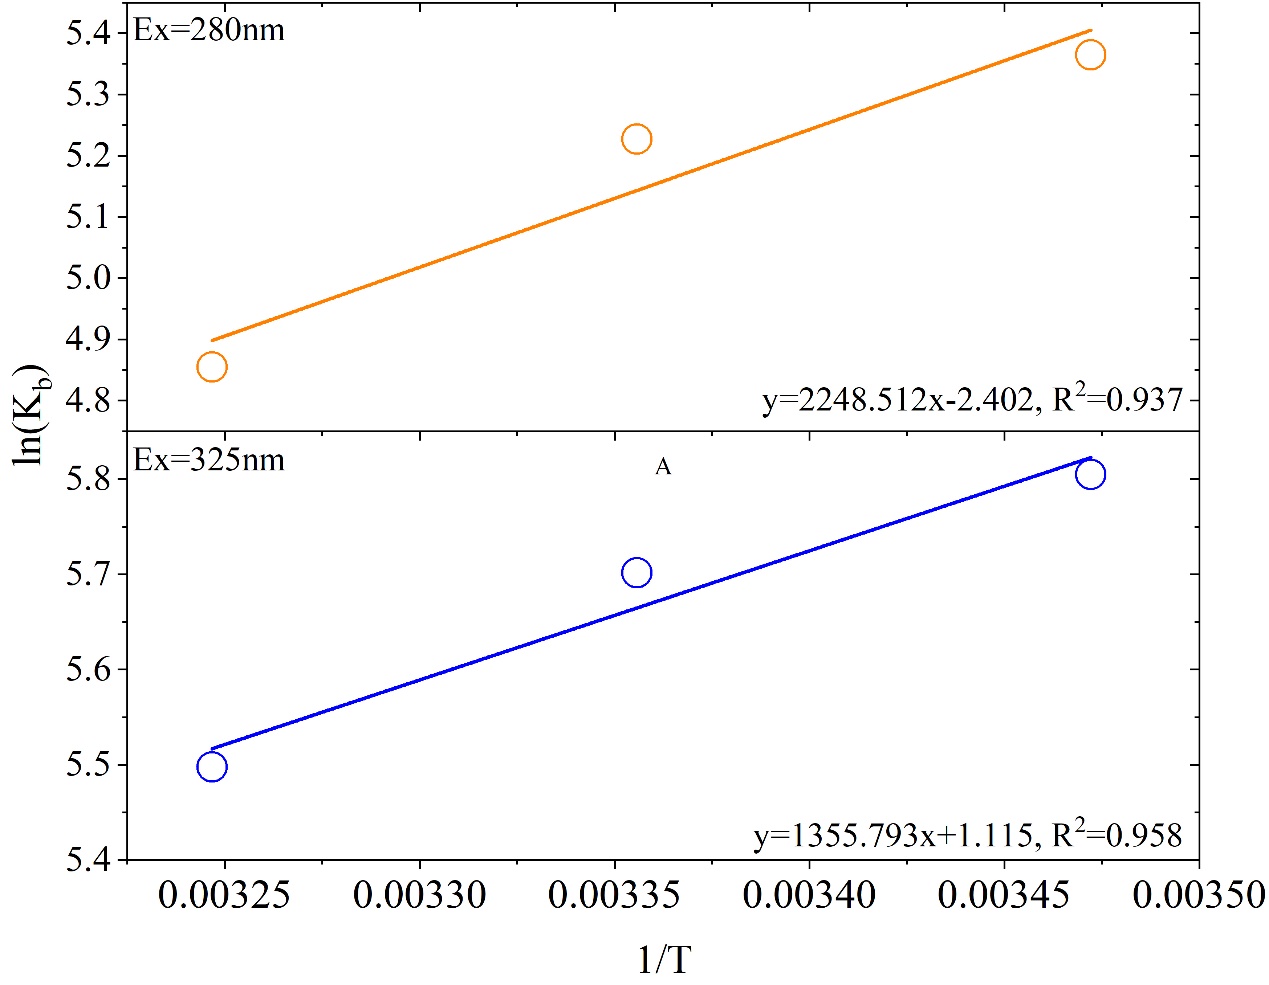


Fig. S1 Fitted results of thermodynamical analysis.
